# Supplementary material for: The Expression and Prognostic Value of FGF2, FGFR3, and FGFBP1 in Esophageal Squamous Cell Carcinoma
Source: Anal Cell Pathol (Amst). 2020 Dec 11;2020:2872479. doi: 10.1155/2020/2872479 (PMC7748917; doi:10.1155/2020/2872479)
Supplement: Supplementary materials — Table 1(s)-Table 3(s): the data of immunohistochemical patients. Table 4 s-7 s: mPCR data information. [file 2872479.f1.zip]

Archive with 7 entries (7 files):
- Table 1s.docx
- Table 3s.docx
- Table 4s FGF2.docx
- Table 6s.docx
- Table 7s primer.docx
- Table2s.docx
- Table5s.docx
